# Supplementary material
Source: Research Square preprint supplement (doi:10.21203/rs.3.rs-9476955/v1)
Supplement: Supplementary file 1 [file ce0da9b2352878ff7a1d5eaf.xlsx]

## Sheet: Sheet1
序号	年份	月份	在院人数	总床日数	感染例数	感染天数	院感率	洗手液用量	年龄
	2023	1	78	2418	5	128	6.41	26000	3978
	2023	2	77	2165	0	0	0	21500	3927
	2023	3	73	2339	3	22	3.9	27000	3723
	2023	4	73	2201	2	22	2.7	28500	3723
	2023	5	73	2263	3	27	4.05	31000	3723
	2023	6	73	2190	0	7	0	28500	3723
	2023	7	73	2263	1	19	1.37	31500	3723
	2023	8	72	2258	15	154	20.55	29500	3672
	2023	9	72	2147	16	75	22.2	31500	3672
	2023	10	74	2241	8	99	10.8	30500	3774
	2023	11	74	2190	1	10	1.35	29000	3774
	2023	12	76	2356	1	6	1.3	29000	3852
	2024	1	76	2356	2	19	2.6	24000	3952
	2024	2	76	2186	0	0	0	24000	3952
	2024	3	77	2370	3	23	3.9	24000	4003
	2024	4	78	2323	6	41	7.69	37500	4056
	2024	5	78	2418	3	37	3.85	21000	4056
	2024	6	78	2340	2	17	2.56	26000	4056
	2024	7	78	2418	0	0	0	36000	4056
	2024	8	78	2418	2	10	2.56	25500	4056
	2024	9	78	2323	2	11	2.56	22000	4056
	2024	10	76	2379	4	43	5.2	42000	3952
	2024	11	78	2309	1	11	1.28	22000	4054
	2024	12	78	2417	6	74	7.7	19000	4025
	2025	1	77	2396	1	14	1.28	36000	4158
	2025	2	77	2152	0	0	0	20000	4158
	2025	3	76	2355	1	4	1.32	28000	4104
	2025	4	75	2256	1	9	1.32	29000	4050
	2025	5	75	2325	1	5	1.33	24000	4050
	2025	6	75	2325	0	0	0	22000	4050
	2025	7	75	2321	0	0	0	36000	4050
	2025	8	76	2348	0	0	0	34000	4104
	2025	9	76	2280	0	0	0	37500	4104
	2025	10	75	2348	2	4	2.63	36000	4050
	2025	11	75	2250	1	9	1.33	38000	4097
	2025	12	75	2325	0	0	0	41000	4097
